# Supplementary material for: Promoter of Vegetable Soybean GmTIP1;6 Responds to Diverse Abiotic Stresses and Hormone Signals in Transgenic Arabidopsis
Source: MDPI journal article supplement (doi:10.3390/ijms232012684), 2022-10-21
Supplement: s1 [file s1]

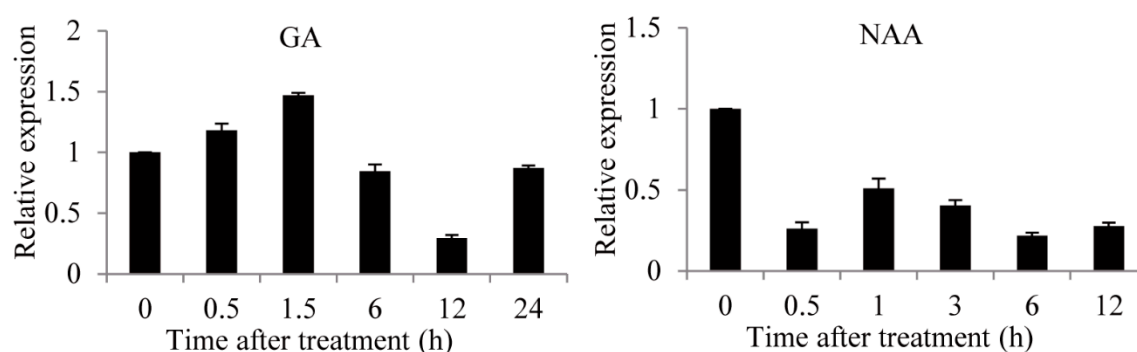

**Figure S1.** Expression patterns of *GmTIP1;6* under 100 nM GA and 100 nM NAA treatments in vegetable soybean seedlings.

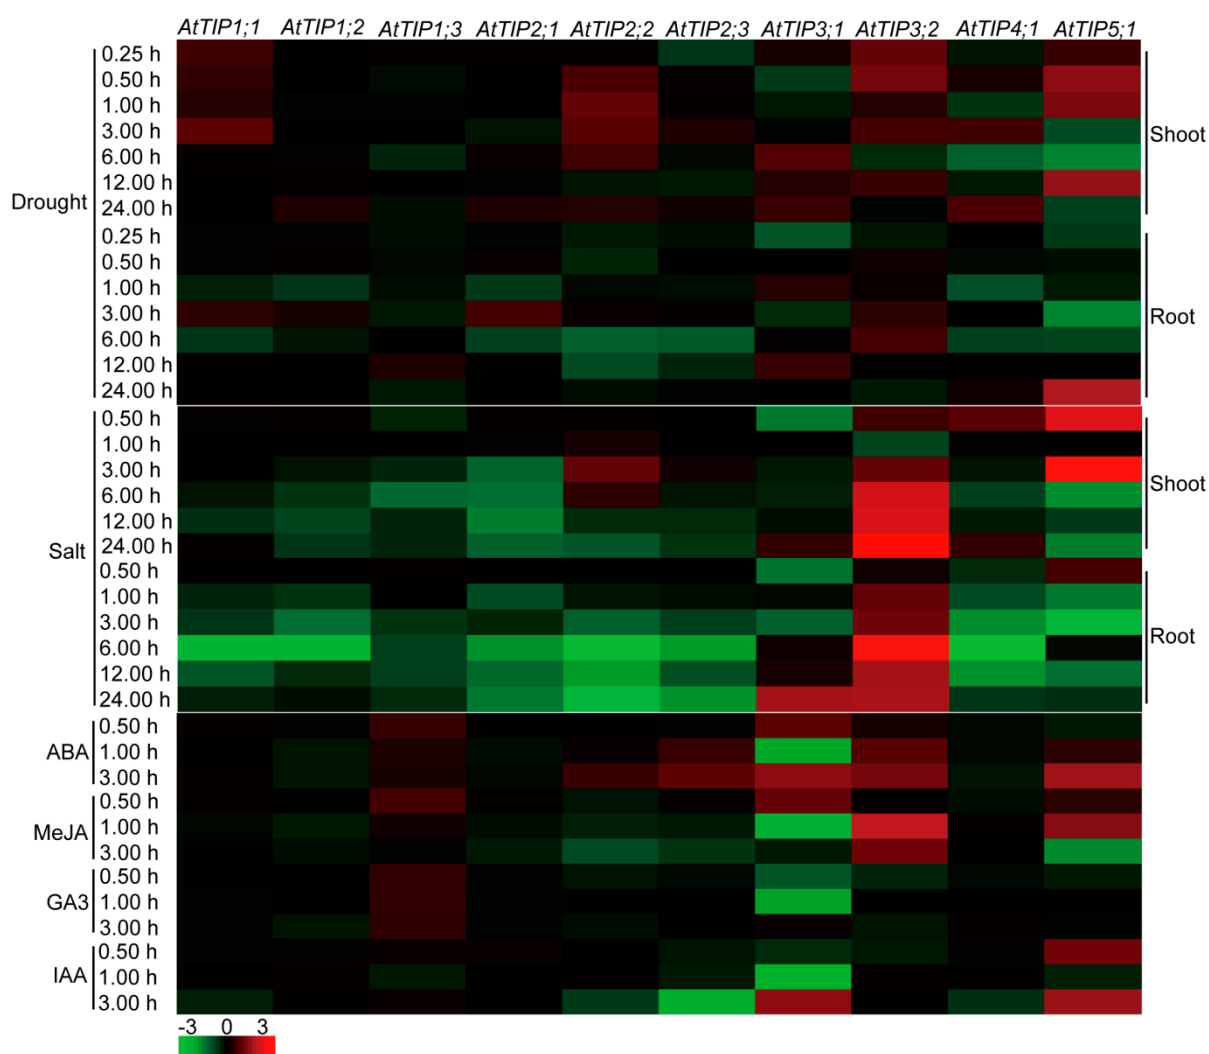

**Figure S2.** Expression profiles of *Arabidopsis AtTIP* genes in response to drought, salt, ABA, MeJA, GA3 and IAA stresses across seven time points (0.25 h, 0.5 h, 1 h, 3 h, 6 h, 12 h and 24 h) in two tissues (roots and shoots). Differences in gene expression levels were shown in color bars, red: higher expression, green: lower expression.

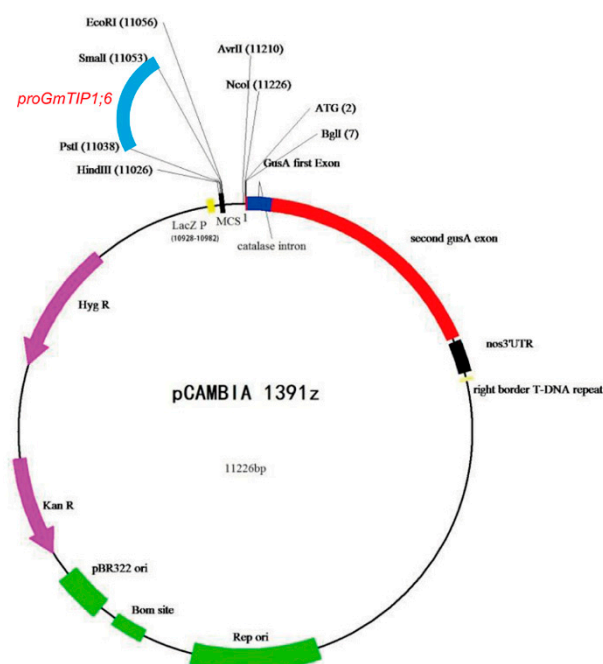

**Figure S3.** Vector construction of *proGmTIP1;6::GUS*. Restriction enzyme sites (*Pst* I and *Sma* I) of pCambia1391z were selected for the insertion of promoter.
