# Supplementary material for: Promoter of Vegetable Soybean GmTIP1;6 Responds to Diverse Abiotic Stresses and Hormone Signals in Transgenic Arabidopsis
Source: Int J Mol Sci. 2022 Oct 21;23(20):12684. doi: 10.3390/ijms232012684 (PMC9604487; doi:10.3390/ijms232012684)
Supplement: Supplementary file 1 [file ijms-23-12684-s001.zip › Table S1.xlsx]

## Sheet: Sheet1
Table S1. List of primers used in this study.
Gene/promoter name	Forward primer	Reverse primer
	Specific primers used for qRT-PCR
GmTIP1;6 gene	CATCCATGAACCCTGCAGT	GAGCTGTTCATGAGTGTTTGG
GmActin11 gene	ACATTGTTCTTAGTGGTGGCT	CTGTTGGAAGGTGCTGAG
	Primers used for promoter cloning
GmTIP1;6 promoter	AGCCGTCCATAATAAACAAA	TTCTTCTGCTTCTTTCTCT
	Primers used for promoter GUS fusion vector construction
GmTIP1;6 promoter	AAACTGCAGAGCCGTCCATAATAAACAAA	TCCCCCGGGTTCTTCTGCTTCTTTCTCT
